# Supplementary material for: Efficient Identification of the MYC Regulator with the Use of the CRISPR Library and Context-Matched Database Screenings
Source: MDPI journal article supplement (doi:10.3390/ijms23147723), 2022-07-13
Supplement: s1 [file s1]

## Supplementary Figure S1

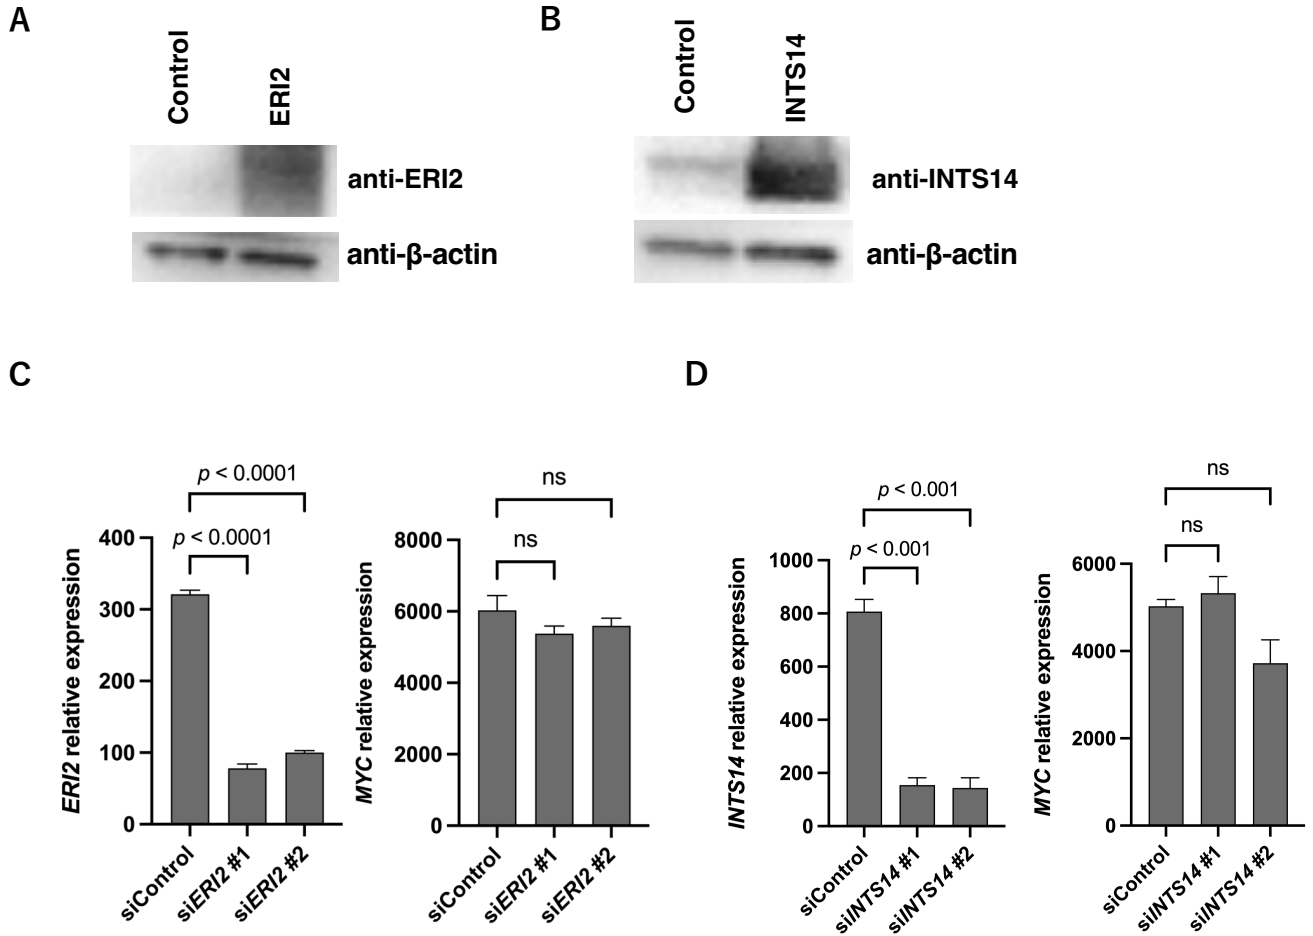

### Supplementary figure S1

A,B. ERI2 or INTS14 were overexpressed using the CAG promoter in HEK293T cells. After 48 h, the results were evaluated by western blotting. Control: GFP was overexpressed with CAG promoter.

C. qPCR after 48 h of *ERI2* knockdown by siRNA transfection in HEK293T cells.

D. qPCR after 48 h of *INTS14* knockdown by siRNA transfection in HEK293T cells.

The values shown are means  $\pm$  SEM ( $n = 3$ ).

## Supplementary Figure S2

A

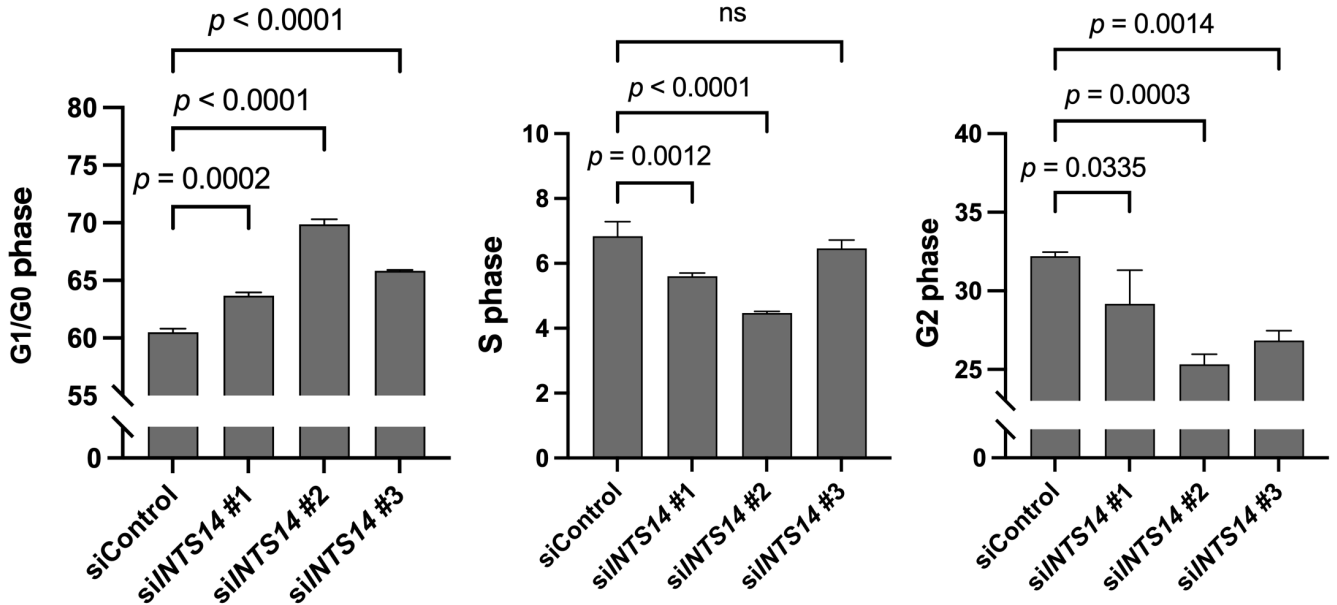

B

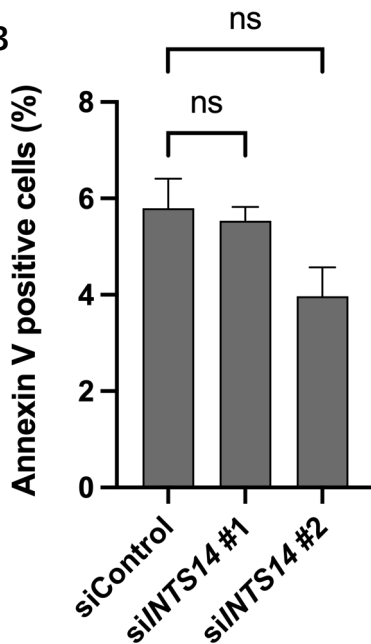

### Supplementary figure S2

A. Cell cycle assay of *INTS14* knock down by siRNA transfection in PC-3 cells. The sequences of siRNA (sense strand) were *INTS14* #1: GGCAGAUUUUUACUUAUUGA, *INTS14* #2: GAAUGGUAGCGAUUGUUGA, *INTS14* #3: GAGAGAUUAUAAUACCCUA and were purchased from BEX CO., LTD.

B. Apoptosis analysis using Annexin V of *INTS14* knockdown by siRNA transfection in PC-3 cells. The values shown are means  $\pm$  SEM ( $n = 3$ ).

### Material and Methods

Apoptosis analysis using Annexin V was performed following the protocol of the Annexin V-FITC (Reagent) (MEDICAL & BIOLOGICAL LABORATORIES CO., LTD.) and annexin V was measured by BD FACS (Becton Dickinson).
